# Supplementary material for: Designed fabrication of MoS2 hollow structures with different geometries and the comparative investigation toward capacitive properties
Source: Royal Society of Chemistry journal article supplement (doi:10.1039/d3cp05196j), 2023-11-25
Supplement: d3cp05196j1.pdf [file d3cp05196j1.pdf]

## Designed of hollow structures with different geometries of MoS<sub>2</sub> and comparative study of their capacitive properties

Yuandong Xu <sup>a,\*</sup>, Haoyang Feng <sup>a</sup>, Chaoyang Dong <sup>a</sup>, Yuqing Yang <sup>a</sup>, Meng Zhou <sup>a</sup>,  
Xing Liu <sup>a</sup>, Jinwei Yuan <sup>a</sup>, Yajun Wei <sup>b,\*</sup>, Hui Guo <sup>a</sup>, Yaqing Wei <sup>a</sup>, Jishan Su <sup>a</sup>,  
Yingying Ben <sup>a</sup>, Xia Zhang <sup>a,\*</sup>

<sup>a</sup> School of Chemistry and Chemical Engineering, Henan University of Technology,  
Zhengzhou 450001, China

<sup>b</sup> School of Chemical Engineering, Northwest Minzu University, Lanzhou 730001,  
China

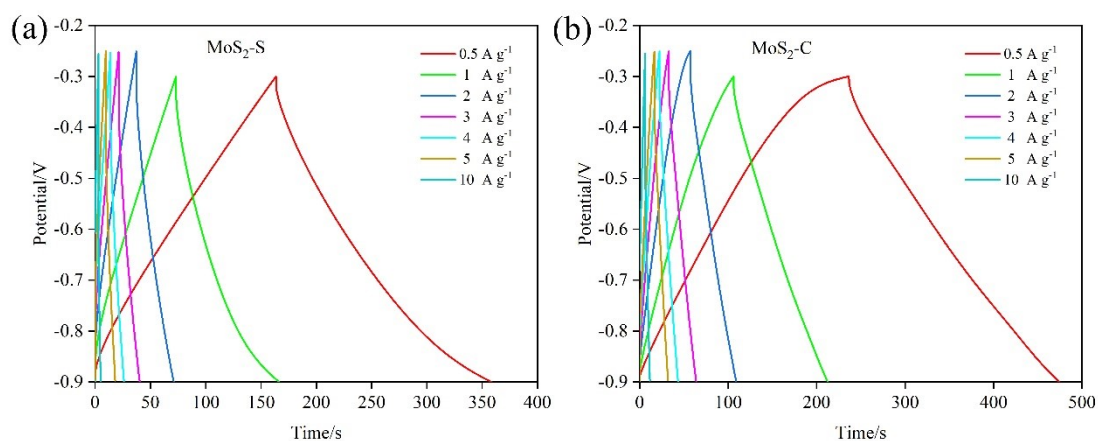

**Figure S1** The GCD curves of (a) MoS<sub>2</sub>-S, (b) MoS<sub>2</sub>-C.

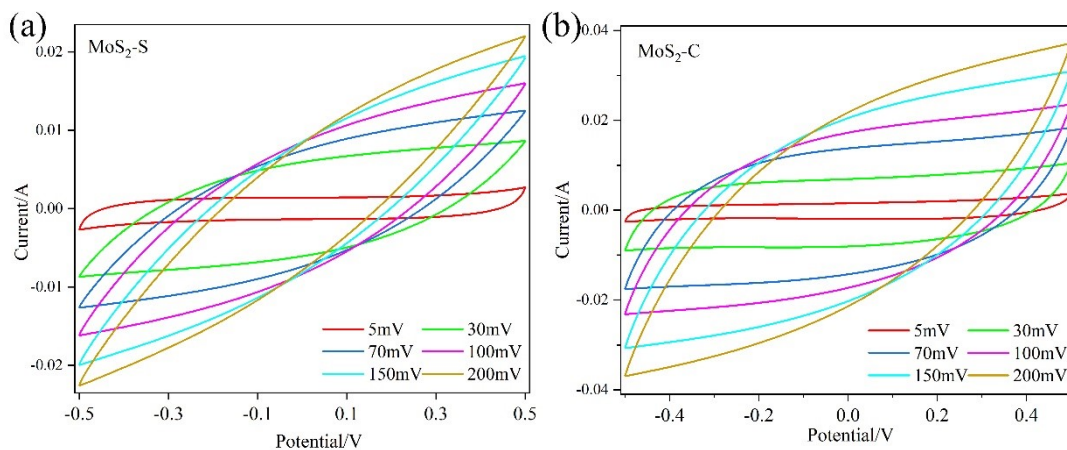

**Figure S2** The symmetrical device with CV curves of (a) MoS<sub>2</sub>-S, (b) MoS<sub>2</sub>-C.
